# Supplementary material
Source: PubMed Central journal article supplement (PMC3340519)

Bailey et al.  
Fig. S1A

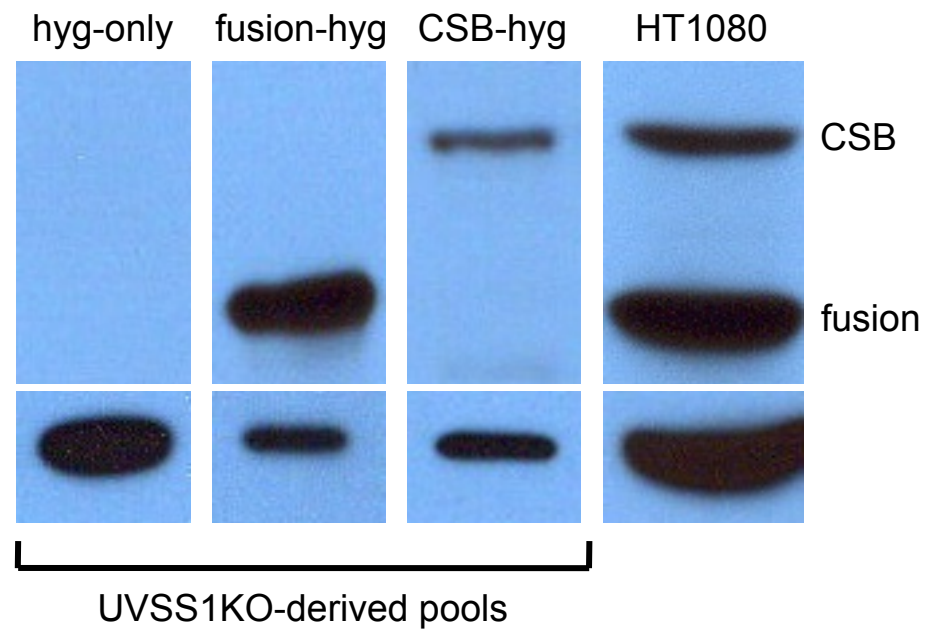

Fig. S1B

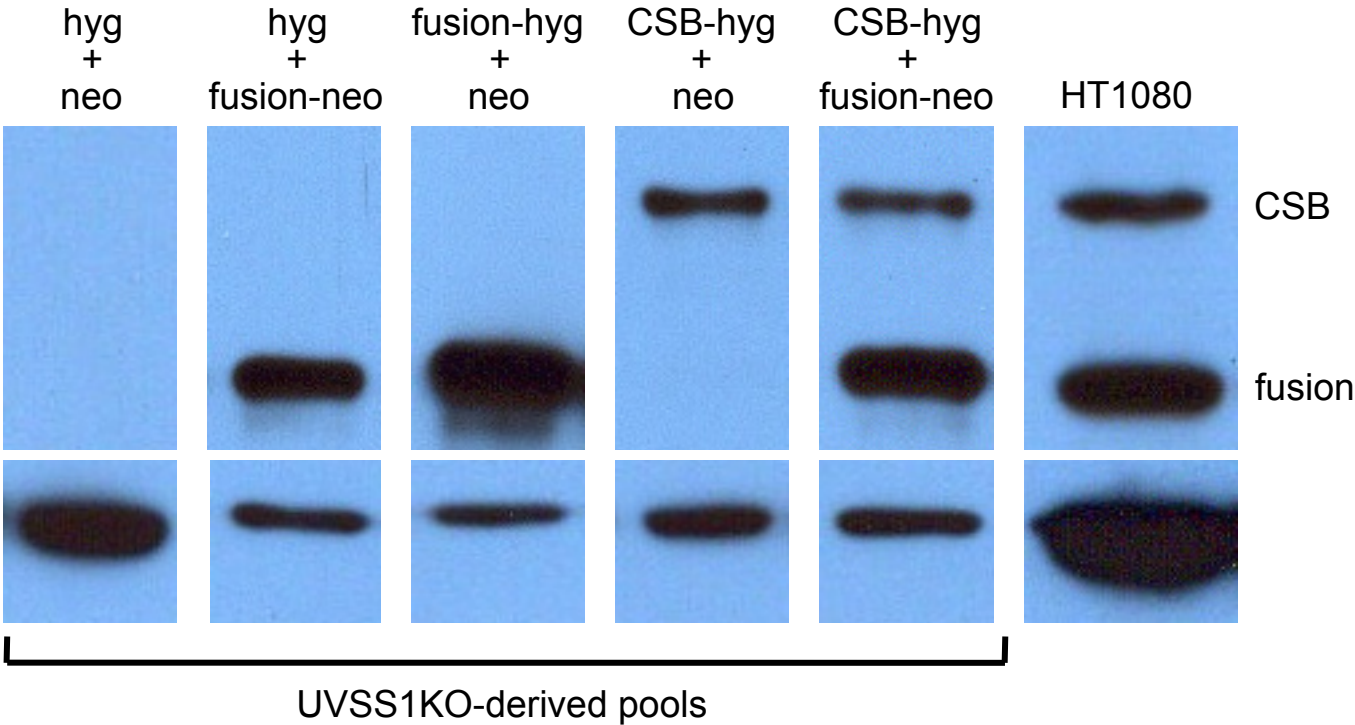

Supplement: NIHMS363194-supplement-FigS1.pdf [file NIHMS363194-supplement-FigS1.pdf]
